# Supplementary material for: YB-1 IS REQUIRED FOR THE GENESIS AND METASTATIC CAPACITY OF HUMAN BREAST CANCER
Source: bioRxiv or medRxiv preprint supplement (doi:10.1101/372524), 2020-11-20
Supplement: Supplementary file [file 372524-1.pdf]

# A CRITICAL ROLE OF YB-1 IN THE GENESIS AND PROGRESSION OF KRAS-MUTATED HUMAN BREAST CANCER

## Supplementary Figure Legends

**Supplementary Figure 1.** High levels of YB-1 are associated with metastatic human breast cancers and *KRAS*-amplified tumors. **a-b**, *YBX1* mRNA expression according to the ER (**a**) or metastatic status (**b**) of invasive breast carcinomas in the TCGA dataset. **c** *YBX1* mRNA expression according to gene copy numbers of *ERBB2* (left panel), *PIK3CA* (middle panel) and *AKT1* (right panel) in invasive breast carcinomas in the TCGA dataset. All *YBX1* values are shown as RPKMs.

**Supplementary Figure 2.** Transplants of primary human mammary cells expressing *myrAKT1* produce DCIS-like structures. **a-b**, Representative IHC images of sections stained for ER, PR, and Ki67 (**a**); or SMA, CK14, CK8-18 and p63 (**b**) in tumors derived from transplants of either BCs or LPs-transduced with *myrAKT1*. Scale bar, 100  $\mu$ m. **c**, Representative FACS profile (left panel) and Western blots (right panel) of human mammary MCF10A cells expressing inducible YB1-2A-KO, cultured with or without doxycycline. **d**, Representative IHC images of sections stained for YB-1 in tumors generated from LPs (left) or BCs (right) transduced with an inducible *myrAKT1* vector, and transplanted into mice given water with or without doxycycline.

**Supplementary Figure 3.** YB-1 is required for dissemination of intravenously injected MDA-MB-231 cells. **a**, Dot plot showing levels of bioluminescence of tumors derived from MDA-MB-231 cells stably expressing a shScr or a shYB-1 cDNA (described in Figure 5H) and assessed 47 days post-transplant. **b**, Comparison of YB-1 levels (staining intensity) in tumors shown in A. **c**, Western blots of MDA-MB-231 cells transfected with *siScr*, *siYB-1#2* or *siYB-1#6*. **d**, Representative pictures of bioluminescence signals obtained in mice 45 days after being injected intravenously with MDA-MB-231 cells transfected with *siScr*, *siYB-1#2* or *siYB-1#6*. **e**, Representative H&E or YB-1 stained photomicrographs of sections of lungs of mice injected intravenously with MDA-MB-231 cells transfected with *siScr*, *siYB-1#2* or *siYB-1#6*.

**Supplementary Figure 4.** Inhibition of YB-1 expression downregulates expression of *PPIF*, *SLC3A2* and *SLC7A1*. **a-b**, Genes whose transcript and protein expression in MDA-MB-231 cells after shYB-1 transduction was either upregulated (**a**) or down-regulated (**b**) by comparison to shScr-transduced (control) cells, based on an analysis of matched pairs of RNAseq and proteomics data. **c-d**, *SLC3A2* and *SLC7A1* mRNA expression according to *KRAS* (**c**) or *YBX1* (**d**) copy number status in invasive breast carcinomas in the TCGA data. Values for *SLC3A2* and *SLC7A1* are shown as RPKMs.

**Supplementary Figure 5.** *KRAS* amplification is associated with a YB-1-regulated HIF1 $\alpha$  response. **a**, Representative images of CAIX-stained sections of tumors produced from shYB-1- or shScr-transduced MDA-MB-231 cells. Scale bar, 100  $\mu$ m. Bar graph shows measured levels of CAIX (staining intensity). **b**, Western blots showing HIF1 $\alpha$

and YB-1 levels (relative to GRB2) in shYB-1- and shScr-transduced MDA-MB-231 cells maintained for up to 24 hours in 1% O<sub>2</sub>. **c**, *HIF1A* (left panel), *CAIX* (middle panel), and *VEGFA* (right panel) transcript levels (RPKM values) shown according to *KRAS* copy number status in the invasive breast carcinoma data set in METABRIC. **d**, *HIF1A* (left panel), *CAIX* (middle panel), and *VEGFA* (right panel) transcript levels are shown according to *YBX1* copy number status in the TCGA invasive breast carcinoma dataset. All transcript values are shown as RPKMs.
